# Supplementary material for: A new perspective for research on the mechanism and kinetic model of aggregation between coastal spilled oil and suspended sediment
Source: Royal Society of Chemistry journal article supplement (doi:10.1039/d5em00645g), 2025-11-04
Supplement: d5em00645g1.pdf [file d5em00645g1.pdf]

## Supplementary Information for

### A new perspective for research on the mechanism and kinetic model of aggregation between coastal spilled oil and suspended sediment

Wanran Li<sup>1,2</sup>, Yue Yu<sup>1,3\*</sup>, Deqi Xiong<sup>1</sup>, Zhixin Qi<sup>1</sup>, Xiaoan He<sup>1</sup>

<sup>1</sup>College of Environmental Science and Engineering, Dalian Maritime University,  
Dalian 116026, China

<sup>2</sup>College of Intelligent and Electronic Engineering, Dalian Neusoft University of  
Information, Dalian 116023, China

<sup>3</sup>National Marine Environmental Monitoring Center, Dalian 116023, China

\*Corresponding author: yueyu@nmemc.org.cn; xiongdq@dlmu.edu.cn

|                                                                                                                        |   |
|------------------------------------------------------------------------------------------------------------------------|---|
| Fig. S1. SEM images of the four mineral particles .....                                                                | 2 |
| Fig. S2. Real and confocal scanning images of OMAs formed by (a,b)<br>montmorillonite and (c,d) natural sediment ..... | 3 |
| Fig. S3. Plot of observed values acquired by the OMA density prediction model<br>versus residuals .....                | 3 |
| Fig. S4. Frequency histogram of the residual values for OMA density prediction<br>model.....                           | 4 |
| Table S1 Basic data of the predictive model for oil dispersion.....                                                    | 5 |
| Section S1. Model development.....                                                                                     | 5 |

As shown in Fig. S1, illite showed a thick foliated morphology comprising expanded lamellar structures, accompanied by extensive surface coverage of micron-scale particulate matter. Quartz sand displayed complex architectures combining both stratified planar configurations and amorphous fibrous assemblies. Similarly, montmorillonite had an obvious sheet-like structure, with regular edges and no cotton-like or fine granular debris. Kaolin represented comparatively underdeveloped sheet morphology characterized by substantial surface asperities and topological irregularities. Morphometric evaluation suggested two distinct geometric configurations: angular embedment within oil droplets or tangential surface contact, with specific orientation preferences observed for different mineral types.

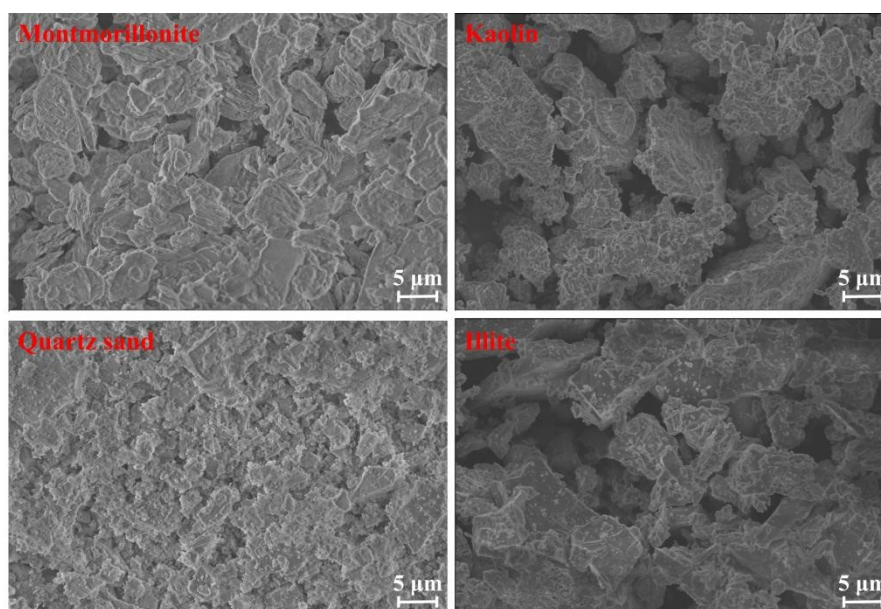

**Fig. S1.** SEM images of the four mineral particles

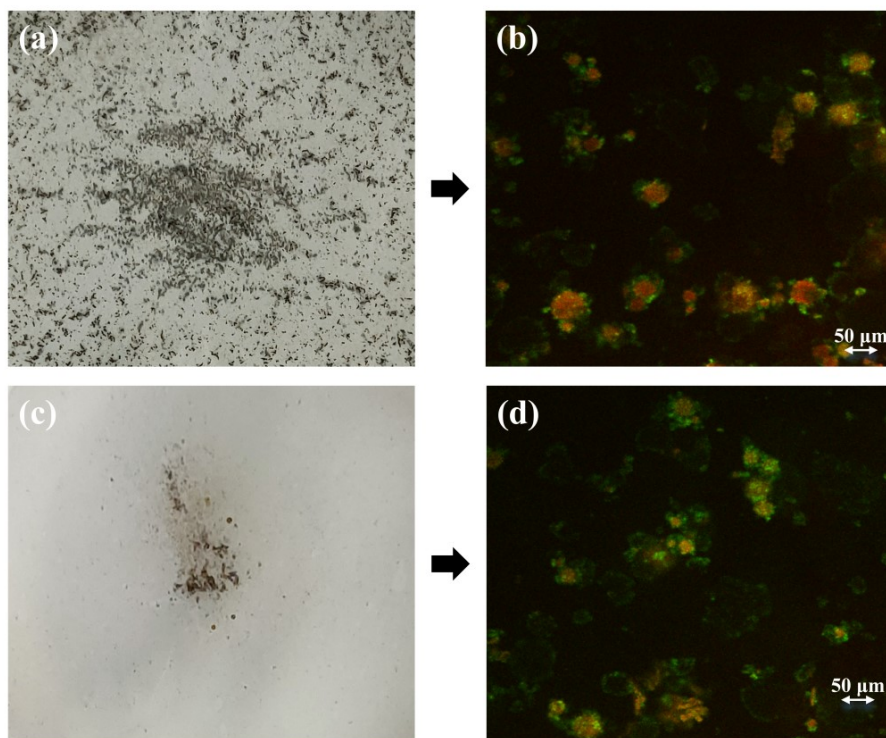

**Fig. S2.** Real and confocal scanning images of OMAs formed by (a,b) montmorillonite and (c,d) natural sediment

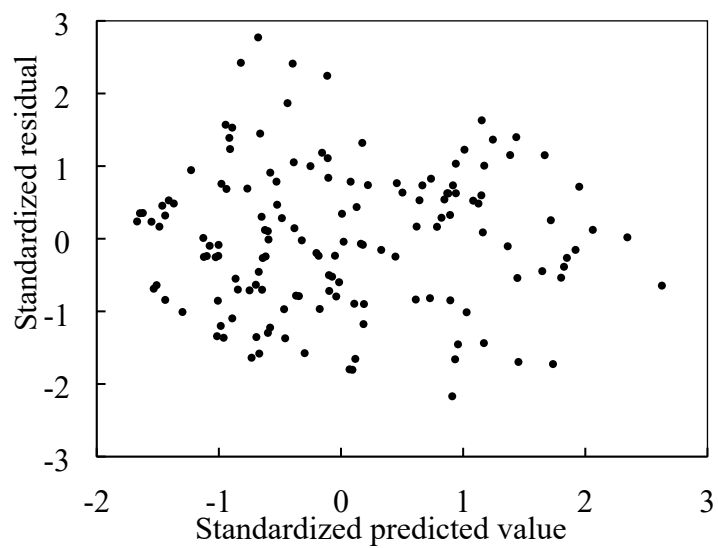

**Fig. S3.** Plot of observed values acquired by the OMA density prediction model versus residuals

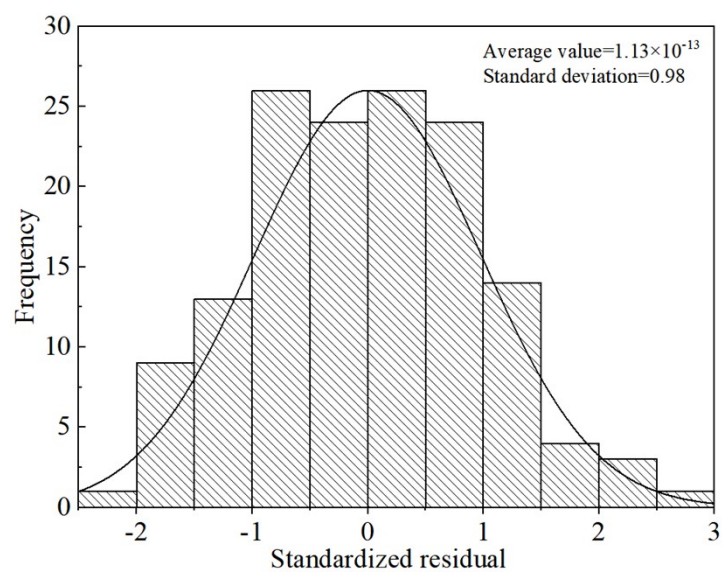

**Fig. S4.** Frequency histogram of the residual values for OMA density prediction model

**Table S1** Basic data of the predictive model for oil dispersion

| Oil type | $T$ (°C) | $ODE_e$ (%) | $Hs$ (cm) | $\rho_{oil}$<br>(kg/m <sup>3</sup> ) | $\mu_{oil}$<br>(mm <sup>2</sup> /s) | $IFT_{ow}$<br>(mN/m) |
|----------|----------|-------------|-----------|--------------------------------------|-------------------------------------|----------------------|
| Oman     | 15       | 35.77       | 4.011     | 872                                  | 392                                 | 13.58                |
| Iranian  | 15       | 24.52       | 4.011     | 927                                  | 1171                                | 22.24                |
| Iranian  | 15       | 21.46       | 2.713     | 927                                  | 1171                                | 22.24                |
| Iranian  | 15       | 12.89       | 1.921     | 927                                  | 1171                                | 22.24                |
| Iranian  | 25       | 43.83       | 4.011     | 927                                  | 417                                 | 16.00                |
| Iranian  | 25       | 29.02       | 2.713     | 927                                  | 417                                 | 16.00                |
| Iranian  | 25       | 20.11       | 1.921     | 927                                  | 417                                 | 16.00                |
| Roncador | 10       | 16.53       | 4.011     | 943                                  | 3752                                | 31.53                |
| Roncador | 15       | 17.43       | 4.011     | 943                                  | 2476                                | 27.57                |
| Roncador | 15       | 12.14       | 2.713     | 943                                  | 2476                                | 27.57                |
| Roncador | 15       | 4.40        | 1.921     | 943                                  | 2476                                | 27.57                |
| Roncador | 20       | 21.83       | 4.011     | 943                                  | 1580                                | 26.27                |
| Roncador | 25       | 28.81       | 4.011     | 943                                  | 1249                                | 22.77                |
| Roncador | 25       | 20.64       | 2.713     | 943                                  | 1249                                | 22.77                |
| Roncador | 25       | 12.25       | 1.921     | 943                                  | 1249                                | 22.77                |
| Merey    | 15       | 3.94        | 4.011     | 952                                  | 8309                                | 36.22                |
| Merey    | 15       | 2.73        | 2.713     | 952                                  | 8309                                | 36.22                |
| Merey    | 15       | 1.41        | 1.921     | 952                                  | 8309                                | 36.22                |
| Merey    | 25       | 7.04        | 4.011     | 952                                  | 3543                                | 25.80                |
| Merey    | 25       | 4.93        | 2.713     | 952                                  | 3543                                | 25.80                |
| Merey    | 25       | 3.41        | 1.921     | 952                                  | 3543                                | 25.80                |
| 180#fuel | 15       | 1.93        | 4.011     | 982                                  | 26113                               | 46.50                |

## Section S1. Model development

The temporal reduction of dispersed oil in the water column can be attributed to the progressive formation of OMA. Based on this premise, the dynamic variation of oil content within OMA over time can be mathematically described as:

$$\frac{dm_{oma}}{dt} = -1.3\alpha \left( \frac{\varepsilon}{\nu} \right)^{\frac{1}{2}} (m_{oil0} - m_{oma}) C_{par} \quad (1)$$

where  $m_{oma}$  is the mass of trapped oil in OMA (kg),  $m_{oil0}$  is the mass of dispersed oil in the water column (kg).  $t=0$  min,  $m_{oma}=0$  kg.

Under the assumption of uniform density in OMA, the density can be calculated as the ratio of the combined mass of constituent oil droplets and mineral particles to the total volume of OMA:

$$\rho_{oma} = \frac{m_{oma} + V(C_{par0} - C_{par})}{m_{oma} / \rho_{oil} + V(C_{par0} - C_{par}) / \rho_{par}} \quad (2)$$

where  $C_{\text{par}0}$  is the initial mass concentration of SPM,  $\rho_{\text{par}}$ ,  $\rho_{\text{oil}}$ ,  $\rho_{\text{oma}}$  are the density of SPM, dispersed oil and formed OMA ( $\text{kg/m}^3$ ),  $V$  is the volume of the solution ( $\text{m}^3$ ). Converting Eq. (3) to express the mass concentration of SPM ( $C_{\text{par}}$ ) at time  $t$ :

$$C_{\text{par}} = C_{\text{par}0} - \frac{\rho_{\text{par}}(\rho_{\text{oma}} - \rho_{\text{oil}})}{\rho_{\text{oil}}(\rho_{\text{par}} - \rho_{\text{osa}})} \frac{m_{\text{oma}}}{V} \quad (3)$$

By substituting Eq. (4) into Eq. (2), analytical solution of the differential equation was obtained, and the kinetic model of  $m_{\text{oma}}$  can be expressed as:

$$m_{\text{oma}} = M_{\text{oil}0} \cdot ODE \frac{1 - \exp(A(C_{\text{par}0} - B)t)}{B/C_{\text{par}0} - \exp(A(C_{\text{par}0} - B)t)} \quad (4)$$

$$A = -1.3\alpha\left(\frac{\varepsilon}{\nu}\right)^{\frac{1}{2}}, \quad B = \frac{\rho_{\text{par}}(\rho_{\text{oma}} - \rho_{\text{oil}})}{\rho_{\text{oil}}(\rho_{\text{par}} - \rho_{\text{oma}})} \frac{m_{\text{oil}0}}{V} \quad (5)$$

where  $M_{\text{oil}0}$  is the initial mass of spilled oil (kg); oil dispersion efficiency ( $ODE$ ) is a characterization parameter for oil dispersion.
